# Supplementary material for: Lactobacillus protects against lead-induced hepatotoxicity by preserving the gut barrier and microbiota remodeling
Source: Research Square preprint supplement (doi:10.21203/rs.3.rs-8195284/v1), 2025-11-26
Supplement: Supplementary file 1 [file 77ff213acdf0cdbc56718108.docx]

**Supplementary Table S1.** Primers used in reverse-transcription (RT) qPCR assay.

| Gene | Primer sequence (from 5’ to 3’) | PCR product |
| --- | --- | --- |
| Mouse *Gadph* | F: GCACAGTCAAGGCCGAGAAT | 151 bp |
|  | R: GCCTTCTCCATGGTGGTGAA |  |
| Mouse *Cldn3* | F: GTTTCGGCATTCATCGGCA | 180 bp |
|  | R: TGCCAGTAGGATAGACACCAC |  |
| Mouse *Cldn5* | F: GCTCTCAGAGTCCGTTGACC | 235 bp |
|  | R: CTGCCCTTTCAGGTTAGCAG |  |
| Mouse *Muc2* | F: GATGGCACCTACCTCGTTGT | 246 bp |
|  | R: GTCCTGGCACTTGTTGGAAT |  |
| Mouse *Tnfα* | F: CTAGCCAGGAGGGAGAACAG | 149 bp |
|  | R: GCTTTCTGTGCTCATGGTGT |  |
| Mouse *Il6* | F: TCTCTCCGCAAGAGACTTCCA | 128 bp |
|  | R: ATACTGGTCTGTTGTGGGTGG |  |

**Supplementary Table S2.** White blood cell counts at week 8 post-inoculation.

| Group | Naïve Ctrl | Pb(II) | Pb(II)+32 | Pb(II)+93 | Pb(II)+277 |
| --- | --- | --- | --- | --- | --- |
| WBC (K/μl) | 6.77 ± 0.96 | 7.06 ± 2.85 | 7.09 ± 2.08 | 7.10 ± 1.67 | 5.95 ± 3.63 |
| NE (K/μl) | 1.45 ± 0.30 | 1.90 ± 1.47 | 1.10 ± 0.45 | 0.96 ± 0.22# | 1.04 ± 0.56 |
| LY (K/μl) | 5.02 ± 0.76 | 4.77 ± 2.07 | 5.78 ± 1.60 | 5.93 ± 1.41 | 4.48 ± 3.15 |
| MO (K/μl) | 0.26 ± 0.08 | 0.19 ± 0.12 | 0.20 ± 0.07 | 0.20 ± 0.06 | 0.25 ± 0.15 |
| EO (K/μl) | 0.05 ± 0.08 | 0.14 ± 0.25 | 0.01 ± 0.00 | 0.01 ± 0.01 | 0.12 ± 0.21 |
| BA (K/μl) | 0.01 ± 0.02 | 0.05 ± 0.09 | 0.00 ± 0.01 | 0.00 ± 0.00 | 0.07 ± 0.13 |
| NE (%) | 21.43 ± 3.56 | 25.87 ± 10.54 | 15.04 ± 2.32 | 13.48 ±1.15 | 19.09 ±4.60 |
| LY(%) | 74.11 ± 4.56 | 66.16 ±14.63 | 81.79 ± 2.22 | 83.61 ±1.25 | 67.23 ± 17.99 |
| MO (%) | 3.73 ± 0.70 | 2.78 ± 1.41 | 2.92 ± 0.71 | 2.69 ± 0.33 | 6.15 ± 4.40 |
| EO (%) | 0.60 ± 1.11 | 3.89 ± 7.41 | 0.19 ± 0.19 | 0.17 ±0.13 | 4.73 ± 6.12 |
| BA (%) | 0.13 ± 0.26 | 1.45 ± 2.79 | 0.07 ± 0.10 | 0.03 ± 0.04 | 2.89 ± 3.90 |

#: p<0.05 comparing to naïve control.

WBC: white blood cell; NE: neutrophil; LY: lymphocyte; MO: monocyte; EO: eosinophil; BA: basophil

**Supplementary Table S3.** Red blood cell and platelet count at week 8 post-inoculation.

| Group | Naive Ctrl | Pb(II) | Pb(II)+32 | Pb(II)+93 | Pb(II)+277 |
| --- | --- | --- | --- | --- | --- |
| RBC (M/μl) | 11.06 ± 1.33 | 11.1 ± 1.14 | 11.16 ± 1.42 | 11.69 ± 1.88 | 9.86 ± 3.89 |
| Hb (g/dl) | 14.66 ± 0.89 | 10.83 ± 7.23 | 13.98 ± 0.24 | 14.64 ± 0.80 | 9.76 ± 7.70 |
| HCT (%) | 81.26 ± 10.19 | 75.90 ± 6.94 | 77.82 ± 10.22 | 81.18 ± 14.10 | 69.08 ± 27.03 |
| MCV (fl) | 73.46 ± 0.72 | 68.53 ± 4.09# | 69.68 ± 1.44# | 69.32 ± 1.02# | 70.16 ± 2.09# |
| MCH (pg) | 13.40 ± 1.66 | 9.53 ± 6.49 | 12.70 ± 1.93 | 12.80 ± 2.28 | 9.12 ± 7.79 |
| MCHC (g/dl) | 16.90 ± 1.74 | 18.26 ± 2.88 | 18.48 ± 3.54 | 18.48 ± 3.54 | 12.76 ± 10.73 |
| RDW (%) | 16.68 ± 1.16 | 17.50 ± 1.96 | 16.88 ± 0.48 | 17.28 ± 0.74 | 17.83 ±1.02 |
| PLT (K/μl) | 1001.2 ± 114.2 | 863.5 ± 214.7 | 899.2 ± 77.8 | 938.2 ±115.4 | 1312.4 ± 901.0 |
| MPV (fl) | 4.68 ± 0.15 | 5.03 ± 0.32 | 4.60 ± 0.12 | 4.60 ± 0.22 | 5.14 ± 0.94 |

#: p<0.05 comparing to naïve control.

RBC: red blood cell; Hb: hemoglobin; HCT: hematocrit; MCV: mean corpuscular volume; MCH: mean corpuscular hemoglobin; MCHC: mean corpuscular hemoglobin concentration; RDW: red blood cell volume distribution width; PLT: platelet; MPV: mean platelet volume.


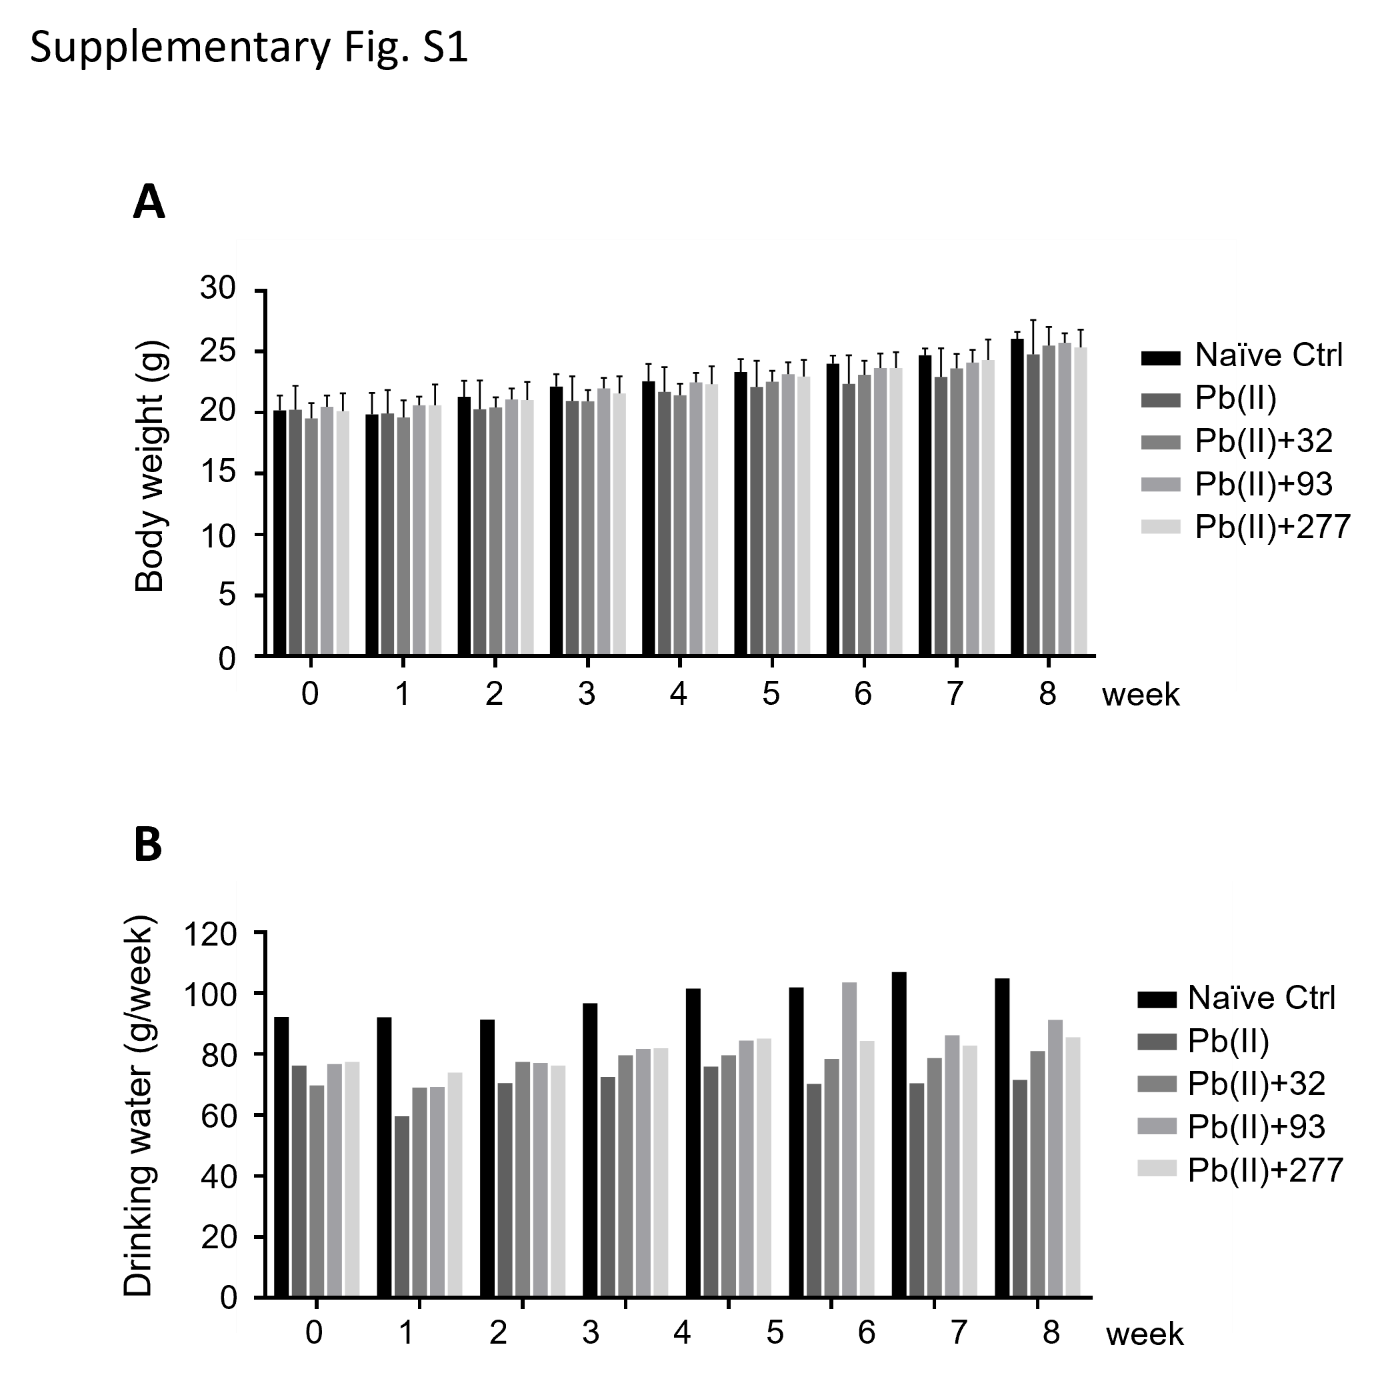


**Supplementary Fig. S1.** Body weight and water intake in mice treated with Pb(II) alone or in combination with probiotics. (A) Weekly body weight and (B) drinking water intake were analyzed during the 8-week experimental period. Data are presented as mean ± SD (*n* = 4 to 5 per group). Statistical significance was evaluated using one-way ANOVA, followed by Tukey’s post hoc test.


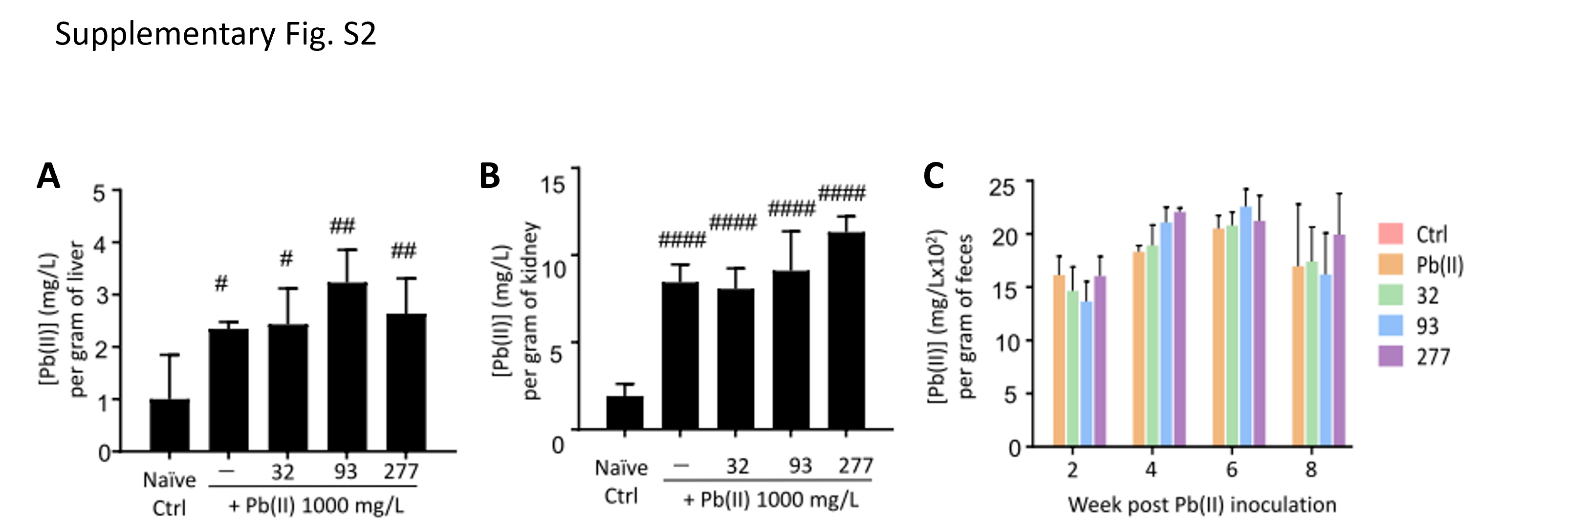


**Supplementary Fig. S2.** Effects of Lactobacillus strains on Pb(II) accumulation in tissues and fecal Pb(II) excretion in mice. (A) Hepatic Pb(II) concentration expressed as mg/L per gram of liver at the end of Pb(II) exposure. (B) Renal Pb(II) concentration expressed as mg/L per gram of kidney at the end of Pb(II) exposure. Mice were assigned to the following groups: Naïve Ctrl (untreated control group), Pb(II) (Pb(II) 1000 mg/L only), 32 (Pb(II) 1000 mg/L plus *Lactobacillus* GMNL-32), 93 (Pb(II) 1000 mg/L plus GMNL-93) and 277 (Pb(II) 1000 mg/L plus GMNL-277). (C) Time course of fecal Pb(II) concentration (mg/L ×10² per gram of feces) at 2, 4, 6 and 8 weeks after Pb(II) inoculation in the same experimental groups. Data are presented as mean ± SD. (n = 4 to 5 per group). Statistical significance was evaluated using one-way ANOVA, followed by Tukey’s post hoc test. Symbols (#, ##, ####) indicate statistically significant differences between each treatment and Naïve Ctrl.


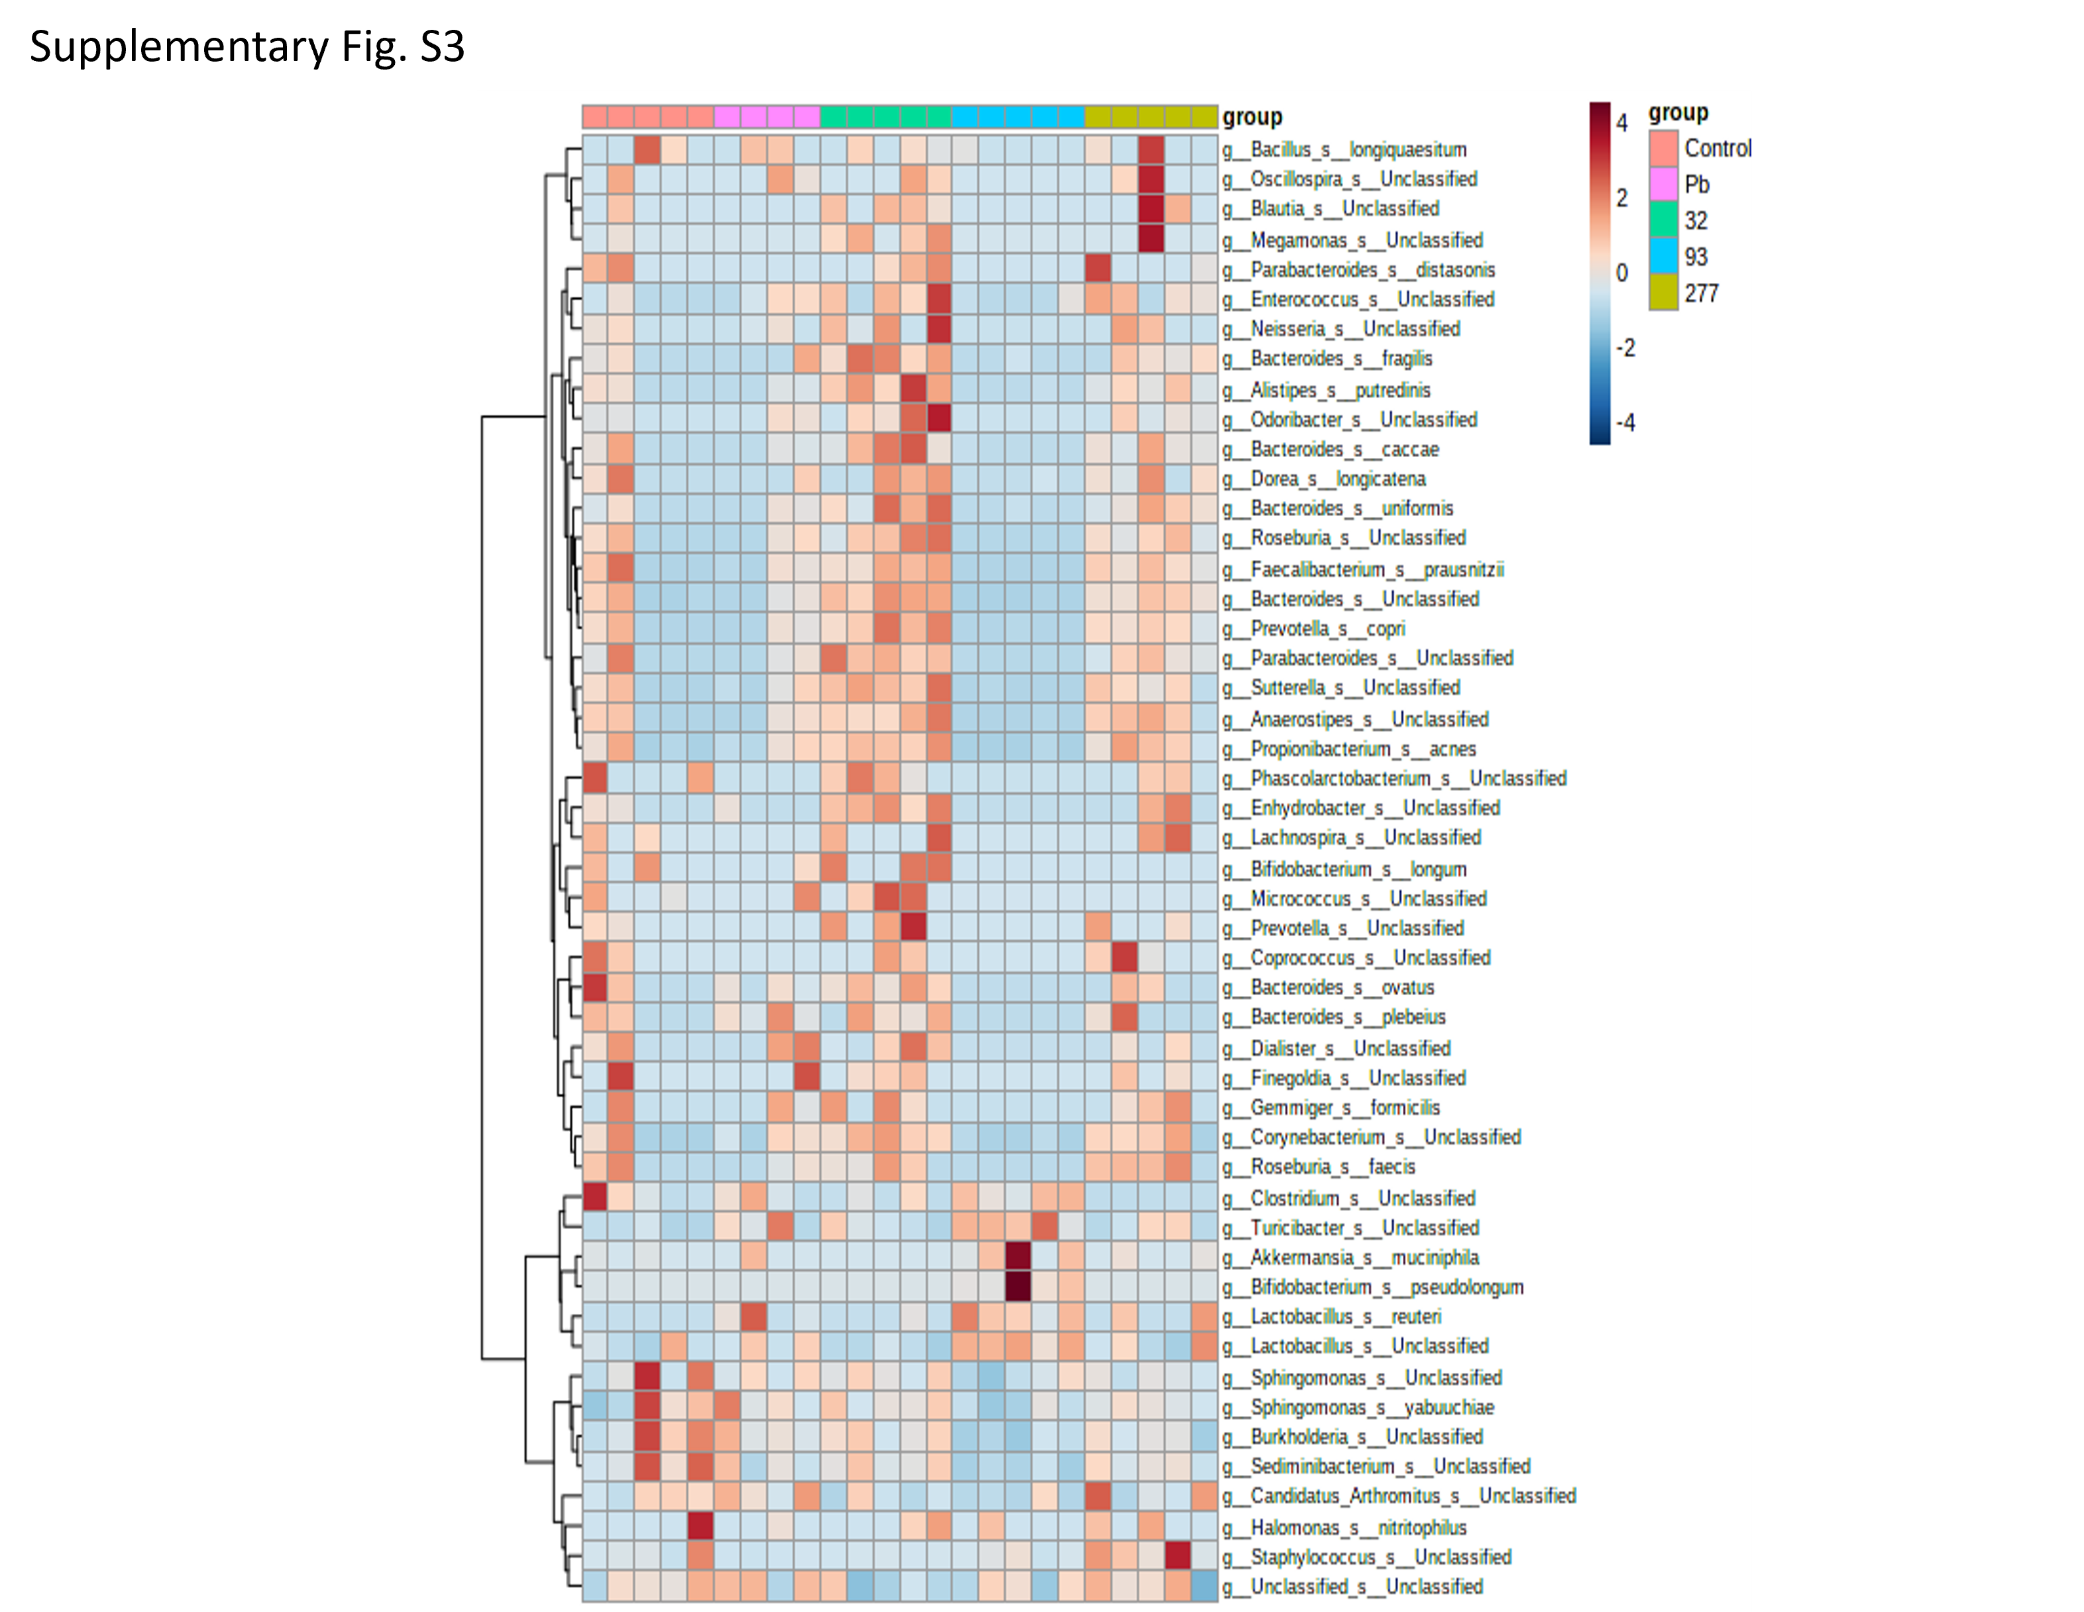


**Supplementary Fig. S3.** Heatmap analysis of major bacterial species across treatment groups. Heatmap of the relative abundance of main bacterial species in fecal samples from each group. Rows indicate bacterial species and columns indicate individual samples clustered by similarity; color intensity represents normalized relative abundance. Groups: Naïve ctrl, untreated group; 32, GMN-32 strain; 93, GMN-93 strain; 277, GMN-277 strain.


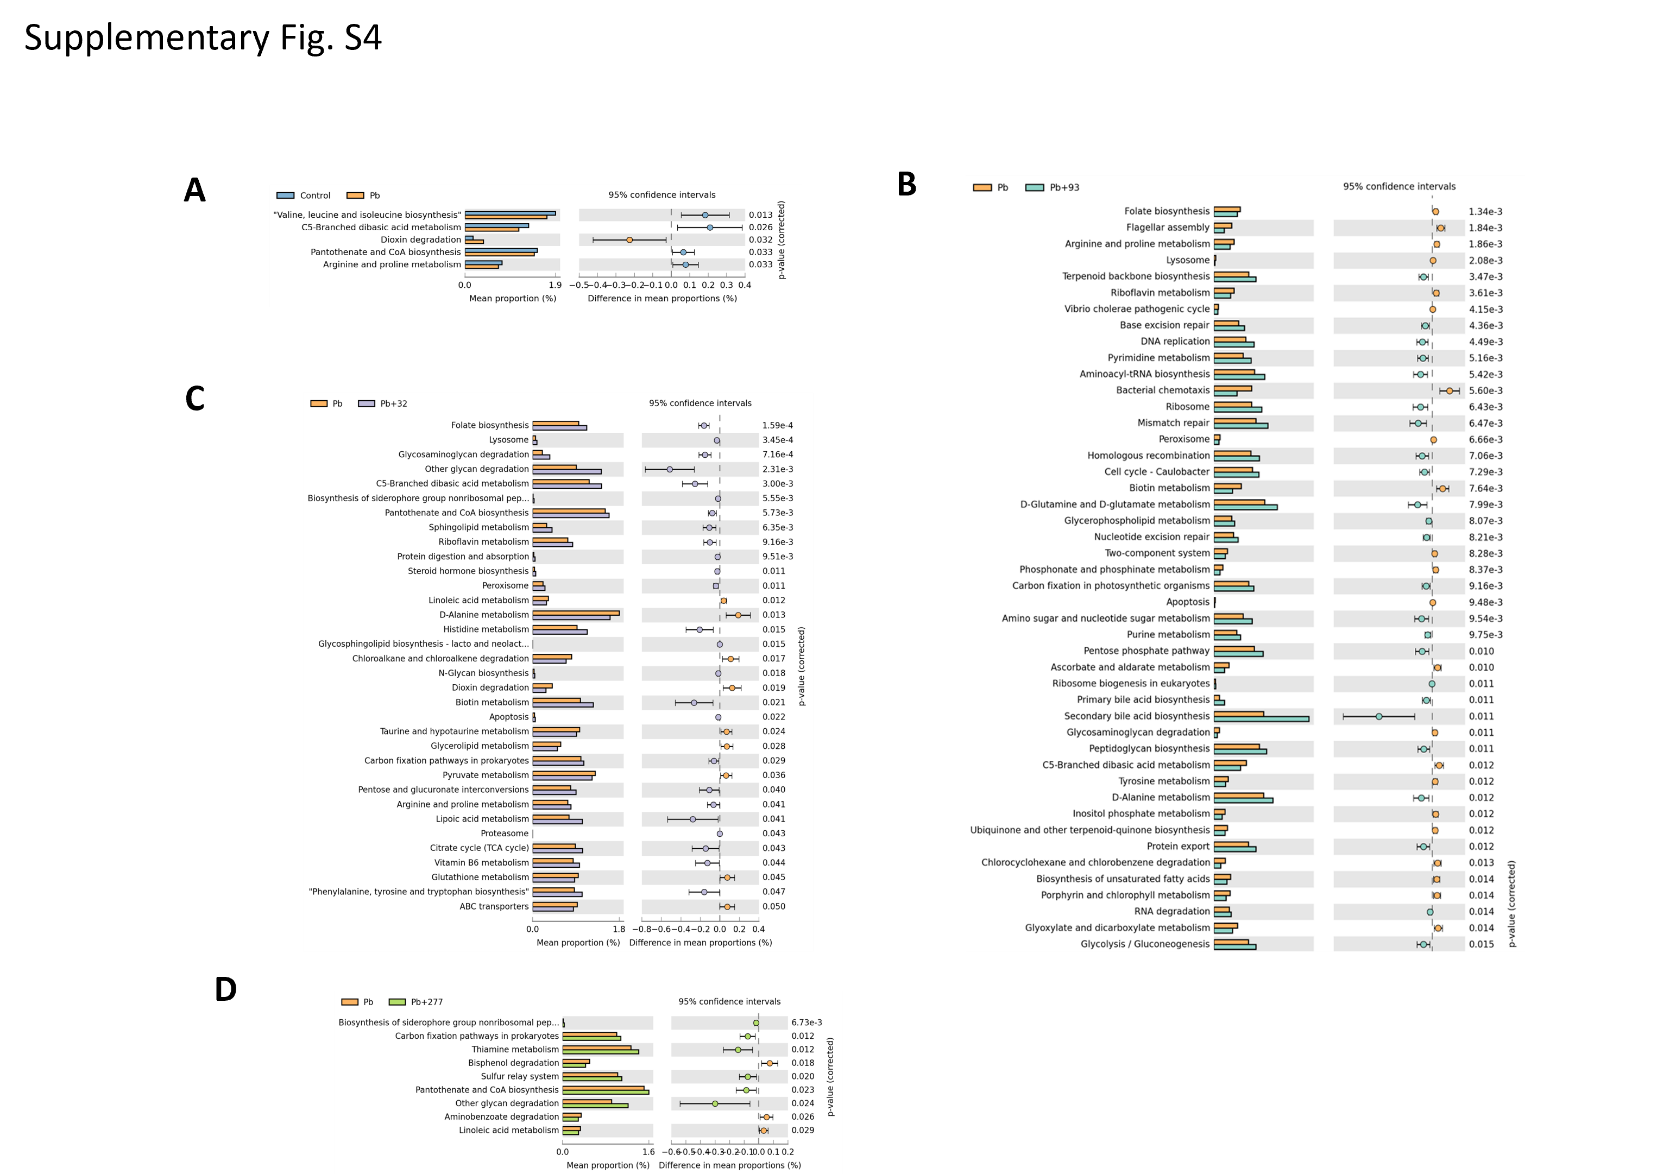


**Supplementary Fig. S4.** Predicted metabolic pathway changes of gut microbiota in response to Pb(II) and probiotics treatments. Extended error bar plot indicating significant functional changes between (A) Control (blue) vs. Pb (orange), (B) Pb (orange) vs. Pb+32 (purple), (C) Pb (orange) vs. Pb+277 (green), and (D) Pb (orange) vs. Pb+93 (blue). Bars show mean pathway proportions, differences in mean proportions with 95% confidence intervals, and corrected p-values for pathways that differ significantly between groups
